# Supplementary material for: Immune Alveolitis in Interstitial Lung Disease: an Attractive Cytological Profile in Immunocompromised Patients.
Source: Research Square preprint supplement (doi:10.21203/rs.3.rs-594950/v1), 2021-06-15
Supplement: Supplementary file 1 [file c6f056952e94a5c93729755a.docx]

**Additional File 1. Viruses’ identification of viral pneumonia.**

| Virus | Total (N=17) |
| --- | --- |
| Respiratory syncitial virus | 3 (18) |
| Coronavirus and Rhinovirus | 3 (18) |
| Coronavirus | 2 (12) |
| Cytomegalovirus | 2 (12) |
| Metapneumovirus | 2 (12) |
| Rhinovirus | 1 (6) |
| Influenza virus | 1 (6) |
| Parainfluenza virus | 1 (6) |
| Epstein-Barr virus | 1 (6) |
| Adenovirus | 1 (6) |

Data are presented as N (%).Abbreviations: N number
